# Supplementary material for: Marine diatoms in ice cores from the Antarctic Peninsula and Ellsworth Land, Antarctica – species diversity and regional variability
Source: Copernicus journal article supplement (doi:10.5194/tc-2021-160), 2021-06-16

**Figure 1 - 6.** Micrographs showing examples of the insoluble particulate matter preserved in ice layers from the Jurassic ice core (JUR). The red rectangle highlights the presence of diatoms and diatom fragments partly obscured by inorganic insoluble particles. Scale bar in bottom right represents 50 microns.

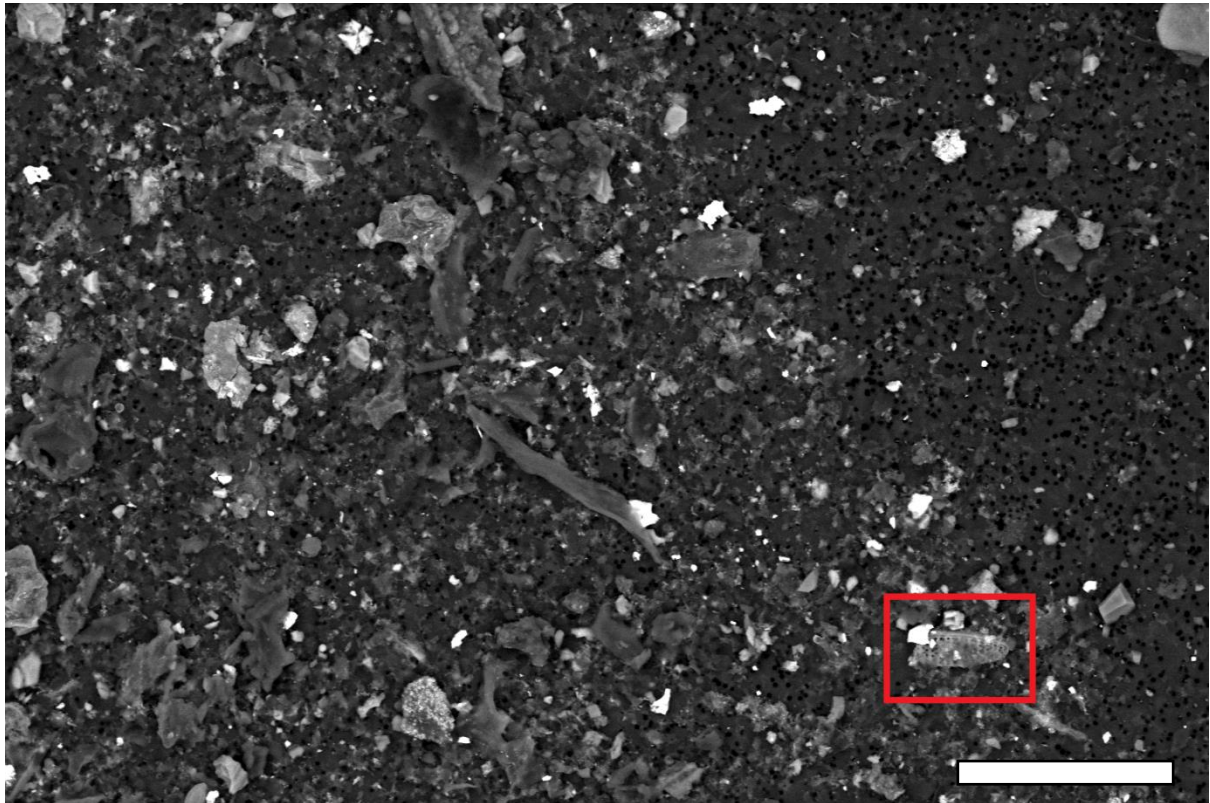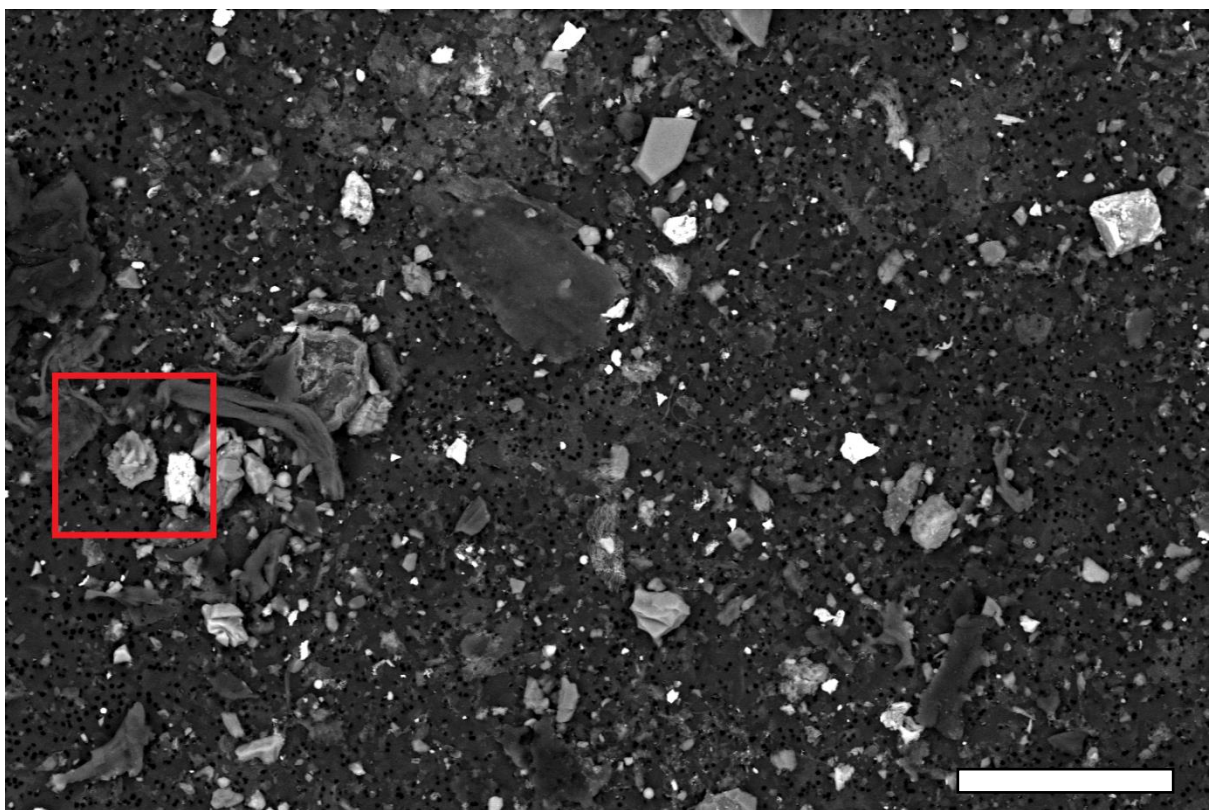



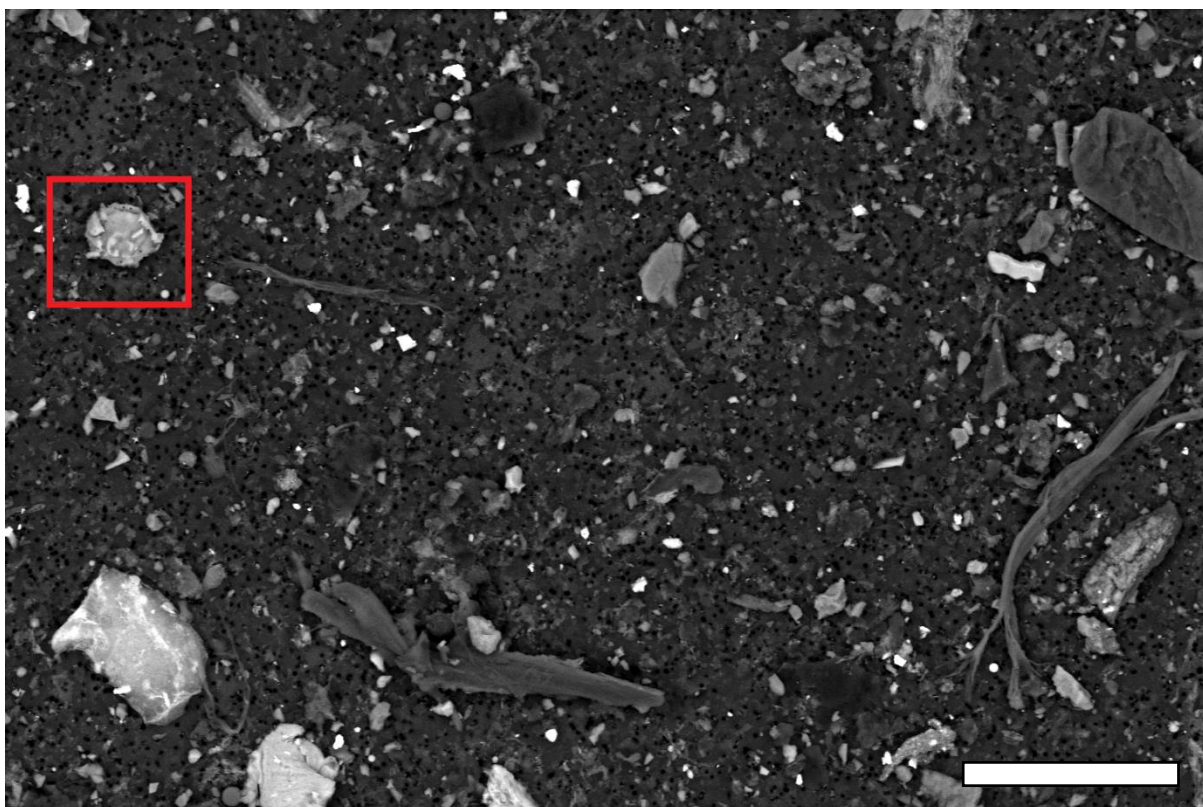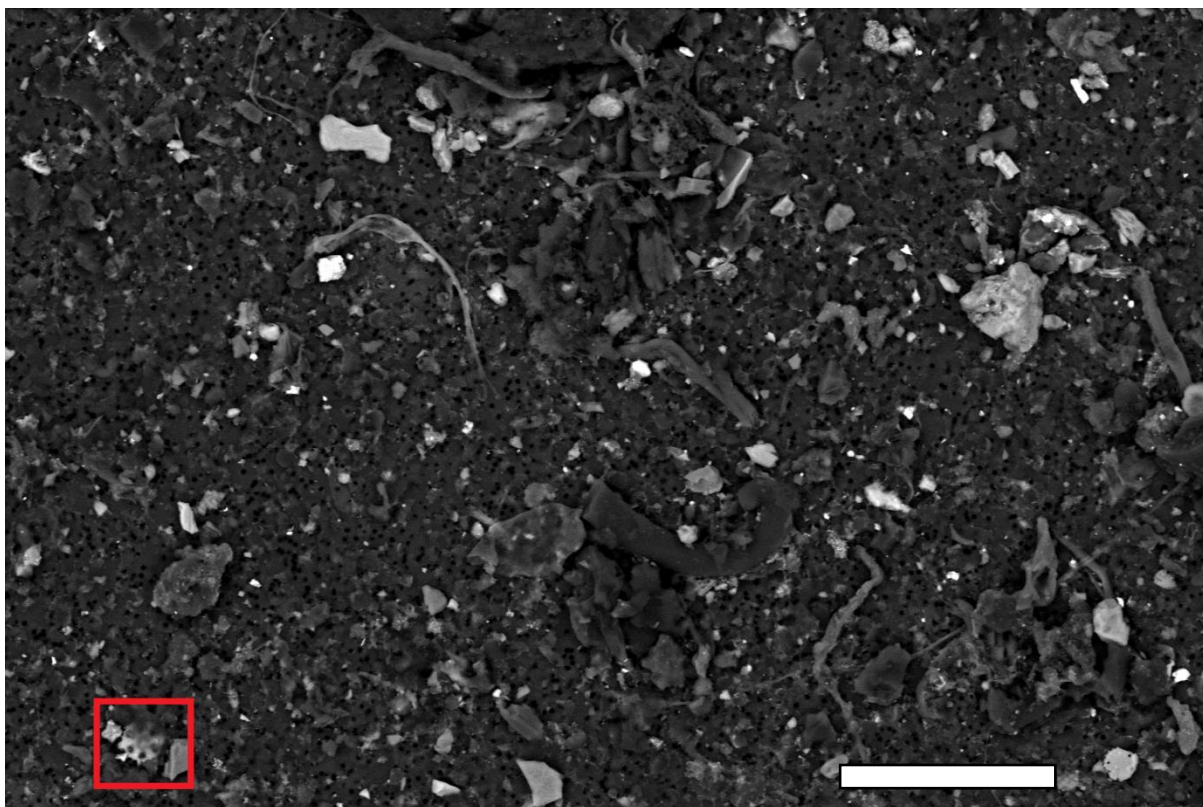



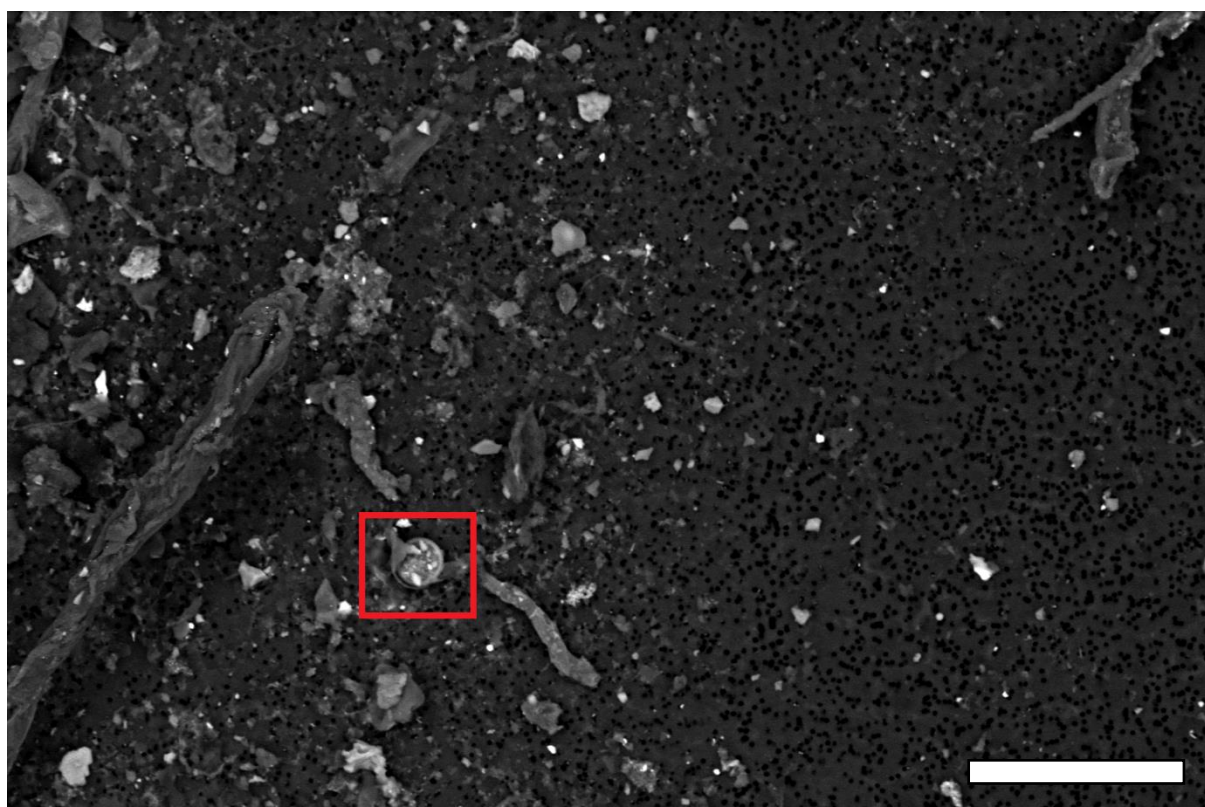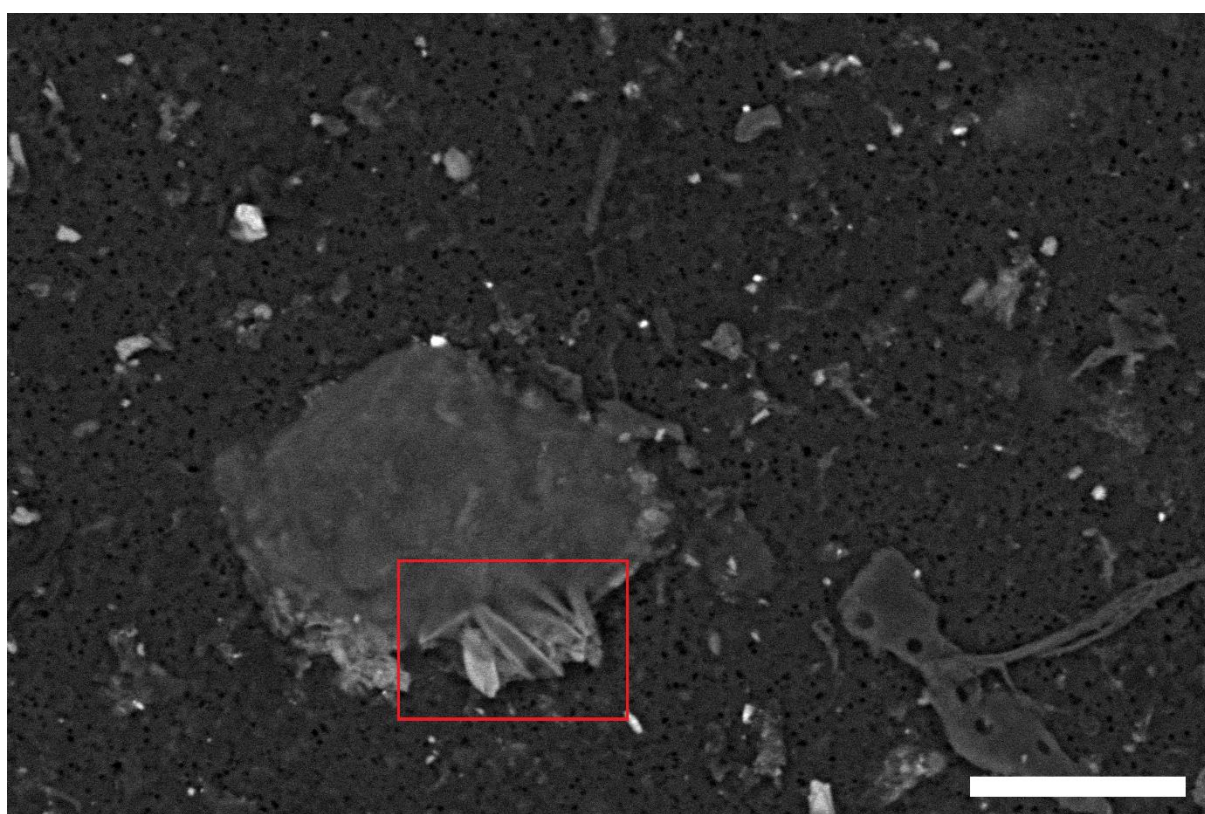

Supplement: Supplementary file [file tc-2021-160-AC1-supplement.pdf]
